# Supplementary material for: Assessment of the contribution of residential waste burning to ambient PM 10 concentrations in Hungary and Romania
Source: Copernicus journal article supplement (doi:10.5194/acp-24-1659-2024), 2024-02-06
Supplement: Supplementary file 1 [file acp-24-1659-2024-supplement.pdf]

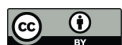

*Supplement of*

## **Assessment of the contribution of residential waste burning to ambient PM<sub>10</sub> concentrations in Hungary and Romania**

**András Hoffer et al.**

*Correspondence to:* András Hoffer ([hoffer.andras@mk.uni-pannon.hu](mailto:hoffer.andras@mk.uni-pannon.hu))

The copyright of individual parts of the supplement might differ from the article licence.

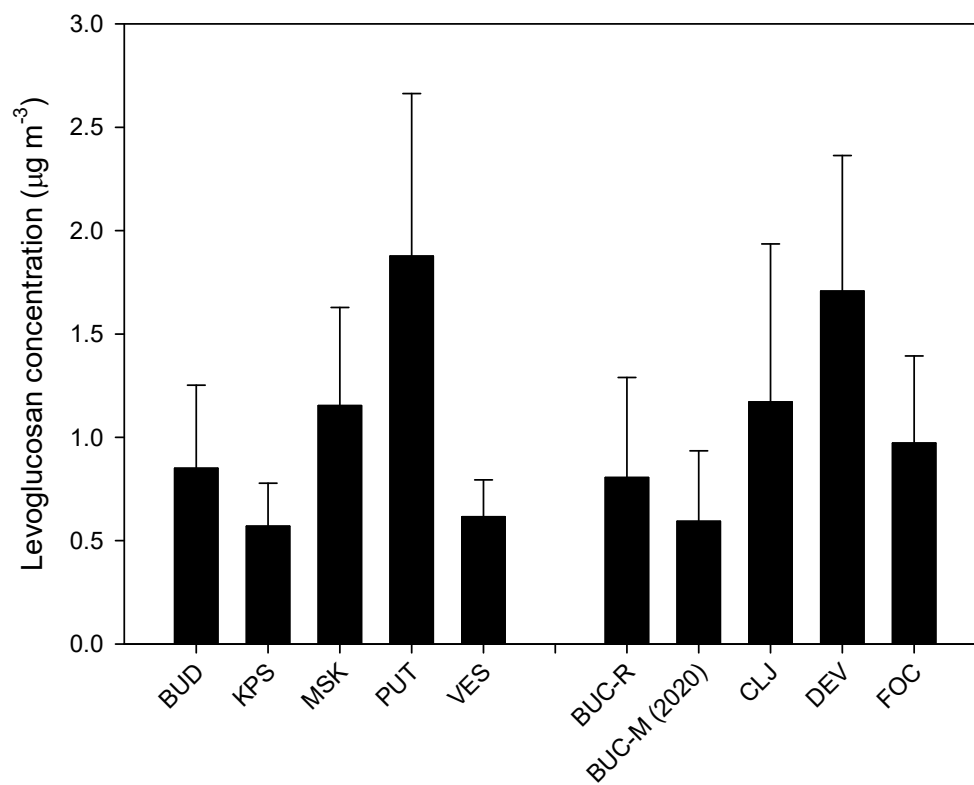

Figure S1 Average concentration of levoglucosan measured at the sampling locations in the heating seasons.

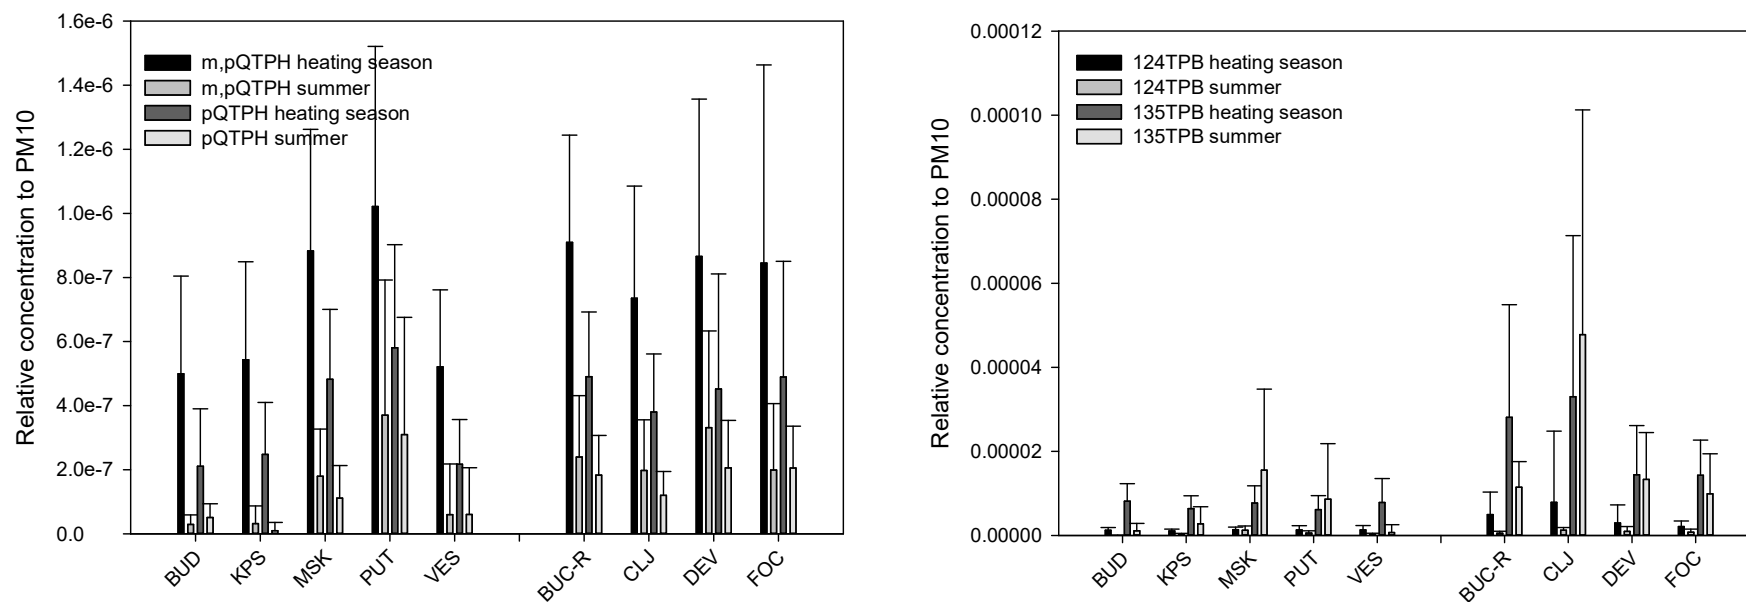

Figure S2 The relative concentration (concentration ratio) of quaterphenyls (left side) and triphenylbenzenes (right side) to PM<sub>10</sub> in the samples collected in the heating season as well as in the summer samples.

## 10 **The calculation of emission factors used in the estimations**

To obtain the average emission factor which was used in the estimation of the contribution of waste burning, both the PM10 emission factor (on a relative scale) reported by Hoffer et al., 2020, and the emission factors of the tracer compounds (both the absolute EFs ( $\text{mg kg}^{-1}$ ) and the relative EFs ( $\mu\text{g g}^{-1} \text{PM}_{10-1}$ ) reported by Hoffer et al., 2021) were used. Since the emission factors of the tracer compounds depend on the type of the burned material, and a given marker compound might also be emitted from the burning of different waste types, we performed a sensitivity analysis by calculating the average emission factors for each tracer compounds for different waste mixtures. (For the relative EFs we have calculated the amount of the emitted PM10 and the amount of the given tracer compound in the emitted PM10 for the different waste mixtures, whereas for the absolute EFs given in Table 4 the amount of the emitted tracer compound was related to the weight of the different waste mixtures). As a starting point, we assumed that on a mass basis, the burned household waste consist of 52.6% furniture panels, 15.8% paper, 15.8% rag and 15.8% plastics (the mass ratios of these waste types in this case is 10:3:3:3, respectively), and calculated the resulting average emission factor for each tracer components. We also assumed that the composition of the plastic waste is 42% PE, 28% PET, 14% PP and PS, 0.7% PVC and ABS according to Bodzay and Bánhegyi, (2016). In the calculations we increased the relative amount of the different waste types and/or groups of the waste mixture by a factor of 10. The weighted averages of the emission factors of the marker compounds were calculated for all possible combinations (altogether 15 combinations). Table S1 and table S2 show the obtained EF values for the different waste mixtures. The results of these calculations are summarized in Table 2 which shows the obtained minimum and maximum relative EF values, as well as the average relative EFs of the 15 possible mixture combinations. Table 4 contains the average absolute EF values. Here, we note that the obtained EF values of the different tracers are characteristic only for those waste types the combustion of which produces the given tracer compound (it is not an average EF for the whole waste mixture), as the effects of the different waste burning emission sources are treated separately. (That is why the estimated EF values of melamine which is emitted solely from the burning of furniture panels does not change as the composition of the burned waste varies).

**Table S1. The EF ( $\mu\text{g g}^{-1} \text{PM}_{10}^{-1}$ ) of the marker compounds for the burning of different waste mixtures**

|             | Composition of waste (%) |     |     |       |      |      |      |      |       | EF ( $\mu\text{g g}^{-1} \text{PM}_{10}^{-1}$ ) |         |       |       |          |        |        |      |     |     |     |          |
|-------------|--------------------------|-----|-----|-------|------|------|------|------|-------|-------------------------------------------------|---------|-------|-------|----------|--------|--------|------|-----|-----|-----|----------|
|             | LDF                      | PAP | RAG | ABS   | PE   | PET  | PP   | PS   | PVC   | 135-TPB                                         | 124-TPB | m-TPH | p-TPH | m,p-QTPH | p-QTPH | 2-BEVT | SSS  | ASS | SAS | SSA | Melamine |
|             | 53                       | 16  | 16  | 0.11  | 6.7  | 4.4  | 2.2  | 2.2  | 0.11  | 169                                             | 68      | 632   | 1823  | 176      | 127    | 70     | 1173 | 175 | 298 | 154 | 19000    |
|             | 92                       | 2.8 | 2.8 | 0.019 | 1.2  | 0.78 | 0.39 | 0.39 | 0.019 | 58                                              | 20      | 183   | 1823  | 176      | 127    | 70     | 505  | 197 | 344 | 177 | 19000    |
|             | 22                       | 65  | 6.5 | 0.046 | 2.8  | 1.8  | 0.92 | 0.92 | 0.046 | 139                                             | 52      | 536   | 1823  | 96       | 127    | 70     | 820  | 109 | 149 | 81  | 19000    |
|             | 22                       | 6.5 | 6.5 | 0.046 | 2.8  | 1.8  | 0.92 | 0.92 | 0.046 | 69                                              | 74      | 618   | 1106  | 117      | 79     | 15     | 1173 | 175 | 298 | 154 | 19000    |
|             | 22                       | 6.5 | 6.5 | 0.46  | 28   | 18   | 9.2  | 9.2  | 0.46  | 343                                             | 101     | 959   | 2392  | 250      | 167    | 196    | 2449 | 140 | 238 | 122 | 19000    |
|             | 74                       | 22  | 2.2 | 0.016 | 0.93 | 0.62 | 0.31 | 0.31 | 0.016 | 60                                              | 19      | 194   | 1823  | 96       | 127    | 70     | 491  | 180 | 306 | 158 | 19000    |
|             | 74                       | 2.2 | 2.2 | 0.016 | 0.93 | 0.62 | 0.31 | 0.31 | 0.016 | 45                                              | 38      | 312   | 1106  | 117      | 79     | 15     | 505  | 197 | 344 | 177 | 19000    |
|             | 74                       | 2.2 | 2.2 | 0.16  | 9.3  | 6.2  | 3.1  | 3.1  | 0.16  | 213                                             | 69      | 652   | 2392  | 250      | 167    | 196    | 1243 | 191 | 334 | 171 | 19000    |
|             | 14                       | 41  | 41  | 0.029 | 1.7  | 1.2  | 0.58 | 0.58 | 0.029 | 70                                              | 66      | 575   | 1106  | 98       | 79     | 15     | 820  | 109 | 149 | 81  | 19000    |
|             | 14                       | 41  | 4.1 | 0.29  | 17   | 12   | 5.8  | 5.8  | 0.29  | 318                                             | 95      | 914   | 2392  | 217      | 167    | 196    | 2090 | 98  | 136 | 73  | 19000    |
|             | 14                       | 4.1 | 41  | 0.29  | 17   | 12   | 5.8  | 5.8  | 0.29  | 247                                             | 96      | 881   | 1823  | 193      | 127    | 70     | 2449 | 140 | 238 | 122 | 19000    |
|             | 61                       | 18  | 18  | 0.013 | 0.78 | 0.52 | 0.26 | 0.26 | 0.013 | 47                                              | 36      | 311   | 1106  | 98       | 79     | 15     | 491  | 180 | 306 | 158 | 19000    |
|             | 61                       | 18  | 1.8 | 0.13  | 7.8  | 5.2  | 2.6  | 2.6  | 0.13  | 205                                             | 66      | 636   | 2392  | 217      | 167    | 196    | 1173 | 175 | 298 | 154 | 19000    |
|             | 61                       | 1.8 | 18  | 0.13  | 7.8  | 5.2  | 2.6  | 2.6  | 0.13  | 174                                             | 70      | 645   | 1823  | 193      | 127    | 70     | 1243 | 191 | 334 | 171 | 19000    |
|             | 10                       | 30  | 30  | 0.21  | 13   | 8.5  | 4.2  | 4.2  | 0.21  | 235                                             | 91      | 850   | 1823  | 176      | 127    | 70     | 2090 | 98  | 136 | 73  | 19000    |
| Min.        | 10                       | 1.8 | 1.8 | 0.013 | 0.78 | 0.52 | 0.26 | 0.26 | 0.013 | 45                                              | 19      | 183   | 1106  | 96       | 79     | 15     | 491  | 98  | 136 | 73  | 19000    |
| Max.        | 92                       | 65  | 65  | 0.46  | 28   | 18   | 9.2  | 9.2  | 0.46  | 343                                             | 101     | 959   | 2392  | 250      | 167    | 196    | 2449 | 197 | 344 | 177 | 19000    |
| Avg.        |                          |     |     |       |      |      |      |      |       | 159                                             | 64      | 593   | 1783  | 165      | 125    | 89     | 1248 | 157 | 260 | 135 | 19000    |
| Values used |                          |     |     |       |      |      |      |      |       | 200                                             | 100     | 600   | 1800  | 200      | 100    | 100    | 1200 | 200 | 300 | 100 | 19000    |

**Table S2. The EF (mg kg<sup>-1</sup>) of the marker compounds for the burning of different waste mixtures**

|      | Composition of waste (%) |     |     |       |      |      |      |      |       | EF (mg kg <sup>-1</sup> ) |         |       |       |          |        |        |     |      |      |      |          |
|------|--------------------------|-----|-----|-------|------|------|------|------|-------|---------------------------|---------|-------|-------|----------|--------|--------|-----|------|------|------|----------|
|      | LDF                      | PAP | RAG | ABS   | PE   | PET  | PP   | PS   | PVC   | 135-TPB                   | 124-TPB | m-TPH | p-TPH | m,p-QTPH | p-QTPH | 2-BEVT | SSS | ASS  | SAS  | SSA  | Melamine |
|      | 53                       | 16  | 16  | 0.11  | 6.7  | 4.4  | 2.2  | 2.2  | 0.11  | 1.1                       | 0.53    | 5.0   | 26    | 1.6      | 1.8    | 0.66   | 5.7 | 0.54 | 0.94 | 0.47 | 51       |
|      | 92                       | 2.8 | 2.8 | 0.019 | 1.2  | 0.78 | 0.39 | 0.39 | 0.019 | 0.23                      | 0.10    | 0.92  | 26    | 1.6      | 1.8    | 0.66   | 1.7 | 0.65 | 1.2  | 0.58 | 51       |
|      | 22                       | 65  | 6.5 | 0.046 | 2.8  | 1.8  | 0.92 | 0.92 | 0.046 | 0.53                      | 0.23    | 2.4   | 26    | 0.35     | 1.8    | 0.66   | 2.5 | 0.25 | 0.33 | 0.18 | 51       |
|      | 22                       | 6.5 | 65  | 0.046 | 2.8  | 1.8  | 0.92 | 0.92 | 0.046 | 0.51                      | 0.62    | 5.2   | 10    | 1.0      | 0.75   | 0.14   | 5.7 | 0.54 | 0.94 | 0.47 | 51       |
|      | 22                       | 6.5 | 6.5 | 0.46  | 28   | 18   | 9.2  | 9.2  | 0.46  | 5.4                       | 1.8     | 17    | 56    | 5.0      | 3.9    | 2.1    | 38  | 0.57 | 0.98 | 0.48 | 51       |
|      | 74                       | 22  | 2.2 | 0.016 | 0.93 | 0.62 | 0.31 | 0.31 | 0.016 | 0.22                      | 0.08    | 0.9   | 26    | 0.35     | 1.8    | 0.66   | 1.5 | 0.54 | 0.93 | 0.47 | 51       |
|      | 74                       | 2.2 | 22  | 0.016 | 0.93 | 0.62 | 0.31 | 0.31 | 0.016 | 0.21                      | 0.21    | 1.8   | 10    | 1.0      | 0.75   | 0.14   | 1.7 | 0.65 | 1.2  | 0.58 | 51       |
|      | 74                       | 2.2 | 2.2 | 0.16  | 9.3  | 6.2  | 3.1  | 3.1  | 0.16  | 1.5                       | 0.60    | 5.9   | 56    | 5.0      | 3.9    | 2.1    | 7.0 | 0.66 | 1.2  | 0.59 | 51       |
|      | 14                       | 41  | 41  | 0.029 | 1.7  | 1.2  | 0.58 | 0.58 | 0.029 | 0.38                      | 0.40    | 3.5   | 10    | 0.57     | 0.75   | 0.14   | 2.5 | 0.25 | 0.33 | 0.18 | 51       |
|      | 14                       | 41  | 4.1 | 0.29  | 17   | 12   | 5.8  | 5.8  | 0.29  | 3.1                       | 1.1     | 11    | 56    | 2.1      | 3.9    | 2.1    | 15  | 0.26 | 0.35 | 0.18 | 51       |
|      | 14                       | 4.1 | 41  | 0.29  | 17   | 12   | 5.8  | 5.8  | 0.29  | 3.0                       | 1.4     | 13    | 26    | 2.6      | 1.8    | 0.66   | 38  | 0.57 | 0.98 | 0.48 | 51       |
|      | 61                       | 18  | 18  | 0.013 | 0.78 | 0.52 | 0.26 | 0.26 | 0.013 | 0.20                      | 0.18    | 1.6   | 10    | 0.57     | 0.75   | 0.14   | 1.5 | 0.54 | 0.93 | 0.47 | 51       |
|      | 61                       | 18  | 1.8 | 0.13  | 7.8  | 5.2  | 2.6  | 2.6  | 0.13  | 1.3                       | 0.51    | 5.0   | 56    | 2.1      | 3.9    | 2.1    | 5.7 | 0.54 | 0.94 | 0.47 | 51       |
|      | 61                       | 1.8 | 18  | 0.13  | 7.8  | 5.2  | 2.6  | 2.6  | 0.13  | 1.3                       | 0.61    | 5.8   | 26    | 2.6      | 1.8    | 0.66   | 7.0 | 0.66 | 1.2  | 0.59 | 51       |
|      | 10                       | 30  | 30  | 0.21  | 13   | 8.5  | 4.2  | 4.2  | 0.21  | 2.2                       | 1.0     | 9.5   | 26    | 1.6      | 1.8    | 0.66   | 15  | 0.26 | 0.35 | 0.18 | 51       |
| Min. | 10                       | 1.8 | 1.8 | 0.013 | 0.78 | 0.52 | 0.26 | 0.26 | 0.013 | 0.20                      | 0.082   | 0.86  | 10    | 0.35     | 0.75   | 0.14   | 1.5 | 0.25 | 0.33 | 0.18 | 51       |
| Max. | 92                       | 65  | 65  | 0.46  | 28   | 18   | 9.2  | 9.2  | 0.46  | 5.4                       | 1.8     | 17    | 56    | 5.0      | 3.9    | 2.1    | 38  | 0.66 | 1.2  | 0.59 | 51       |
| Avg. |                          |     |     |       |      |      |      |      |       | 1.4                       | 0.62    | 5.90  | 30    | 1.9      | 2.1    | 0.90   | 9.9 | 0.50 | 0.85 | 0.43 | 51       |

## References

Bodzay, B. and Bánhegyi, G.: Polymer waste: controlled breakdown or recycling? *Int. J. Des. Sci. Technol.*, 22(2), 109–138, 2016.

50

Hoffer, A., Jancsek-Turoczi, B., Tóth, Á., Kiss, G., Naghiu, A., Levei, E. A., Marmureanu, L., Machon, A. and Gelencsér, A.: Emission factors for PM10 and polycyclic aromatic hydrocarbons (PAHs) from illegal burning of different types of municipal waste in households. *Atmos. Chem. Phys.* 20(24), 16135–16144, <https://doi.org/10.5194/acp-20-16135-2020>, 2020.

55

Hoffer, A., Tóth, Á., Jancsek-Turóczi, B., Machon, A., Meiramova, A., Nagy, A., Marmureanu, L., and Gelencsér, A.: Potential new tracers and their mass fraction in the emitted PM10 from the burning of household waste in stoves, *Atmos. Chem. Phys.*, 21, 17855–17864, <https://doi.org/10.5194/acp-21-17855-2021>, 2021.

60
